# Supplementary material for: Soil Particles and Phenanthrene Interact in Defining the Metabolic Profile of Pseudomonas putida G7: A Vibrational Spectroscopy Approach
Source: PubMed Central journal article supplement (PMC6288191; doi:10.3389/fmicb.2018.02999), 2018-12-04
Supplement: Image_3.pdf [file Image_3.pdf]

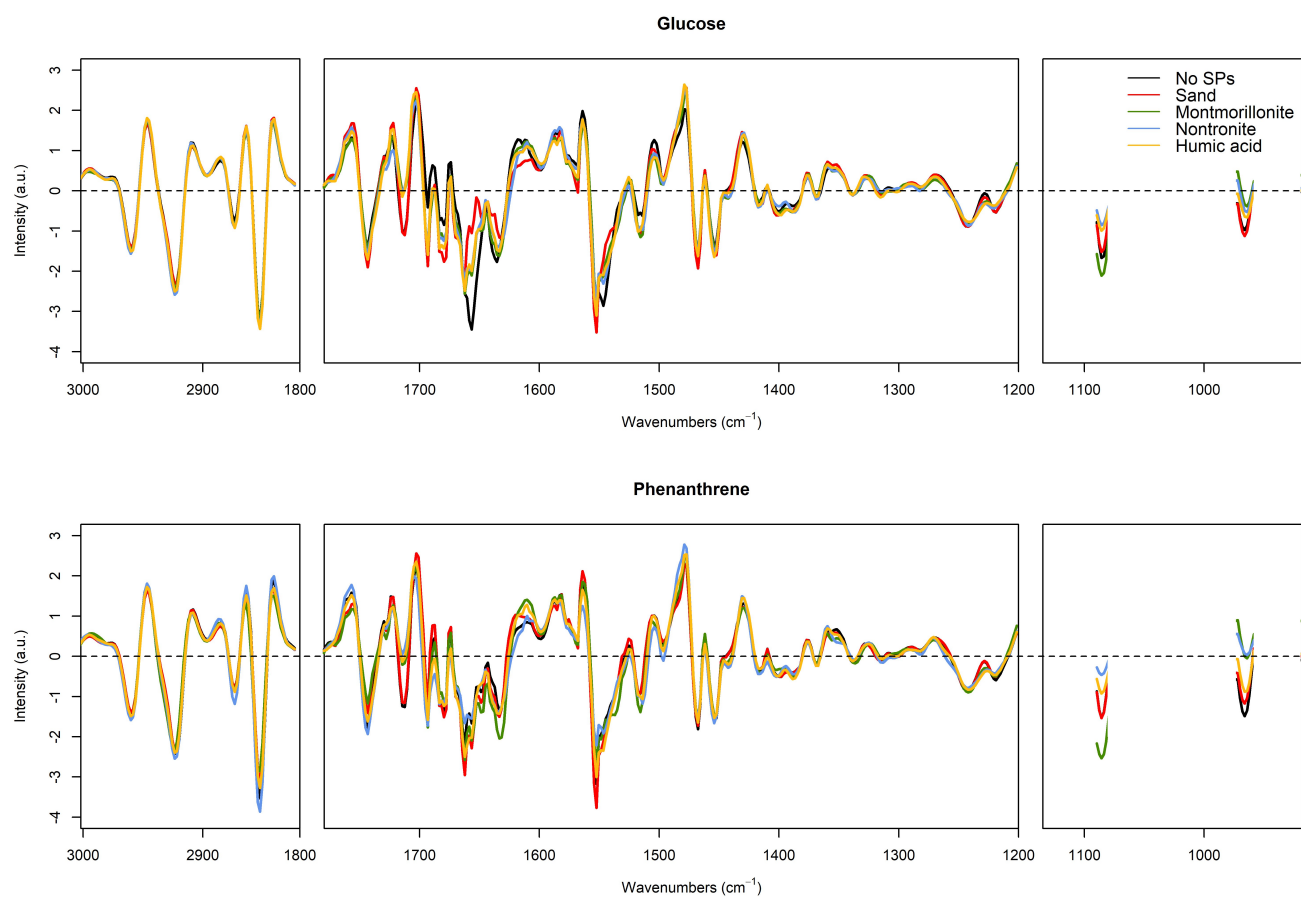

**Figure S3.** Average FTIR spectra of *P. putida* grown in the absence and presence of different SPs and metabolizing glucose (upper panel) or phenanthrene (lower panel) as the sole energy and C-source. The spectra were converted to 2<sup>nd</sup> derivatives and normalized using the standard normal variate transformation (see main text).
