# Supplementary material for: Soil Particles and Phenanthrene Interact in Defining the Metabolic Profile of Pseudomonas putida G7: A Vibrational Spectroscopy Approach
Source: PubMed Central journal article supplement (PMC6288191; doi:10.3389/fmicb.2018.02999), 2018-12-04
Supplement: Image_4.pdf [file Image_4.pdf]

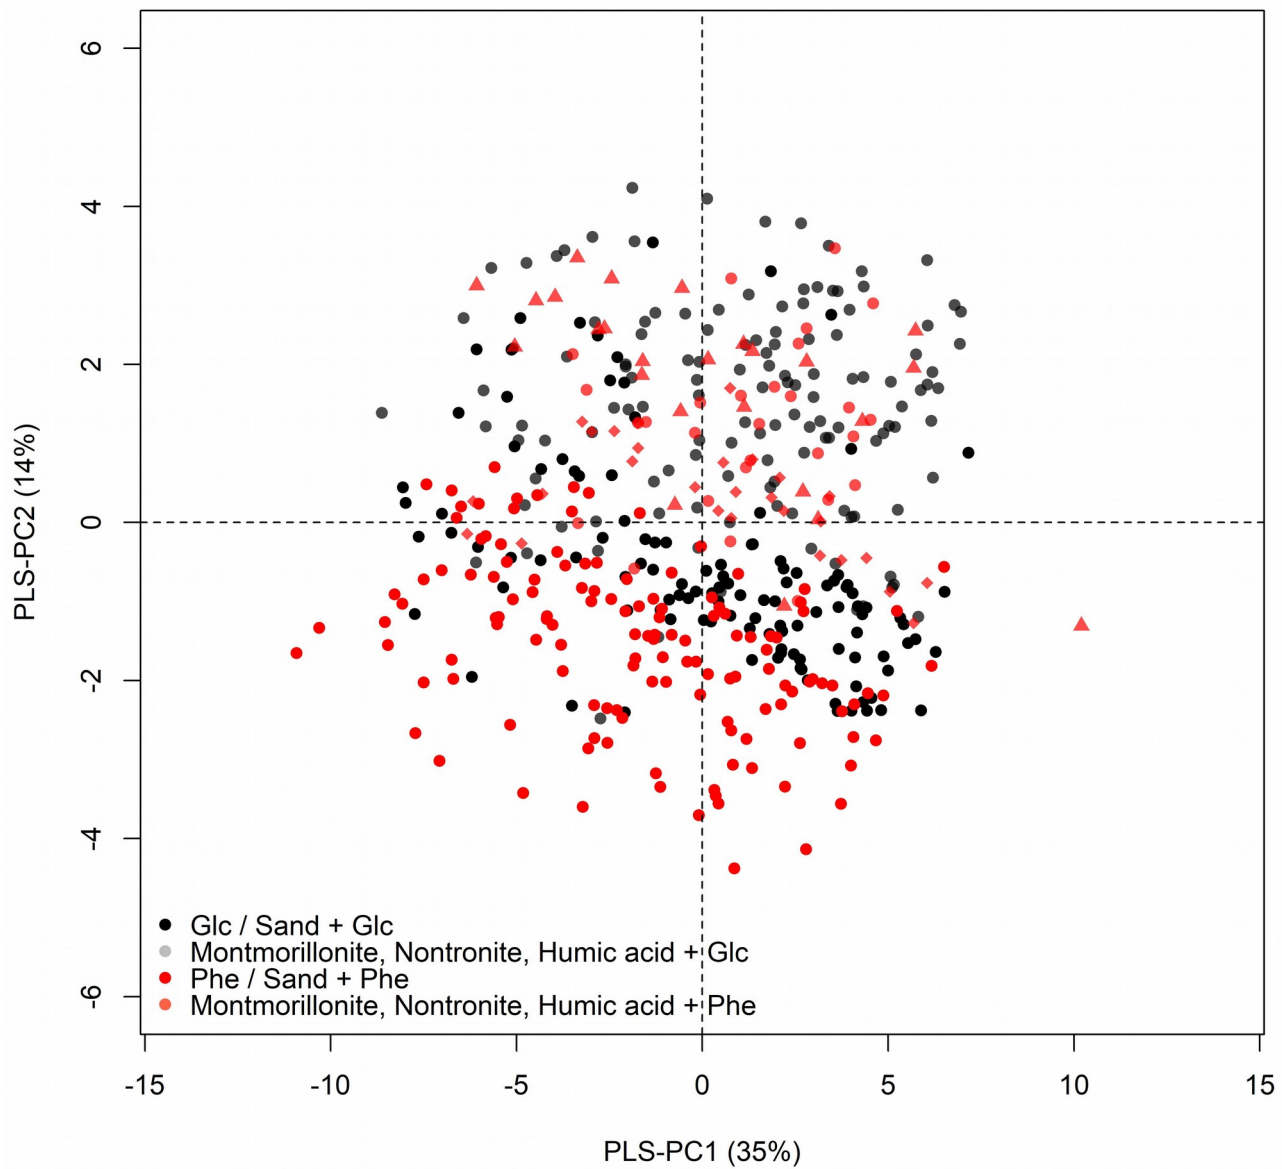

**Figure S4.** Partial Least Square Discriminant analysis (PLS-DA). Scores plot of the model calibrated to discriminate the C-source (phenanthrene (Phe) and glucose (Glc)) based on FTIR spectra.
