# Supplementary material for: Soil Particles and Phenanthrene Interact in Defining the Metabolic Profile of Pseudomonas putida G7: A Vibrational Spectroscopy Approach
Source: PubMed Central journal article supplement (PMC6288191; doi:10.3389/fmicb.2018.02999), 2018-12-04
Supplement: Table_1.pdf [file Table_1.pdf]

**Table S1.** Variance explained by the first eight principal components (PLS-PC) of the PLS-DA model calibrated for the discrimination of each experimental treatment (i.e.  $\pm$  SPs and glucose (Glc) or phenanthrene (Phe)) based on FT-Raman spectra of *Pseudomonas putida*. The number of components for each model was chosen based on the minimal RMSEP and maximal R<sup>2</sup> values.

|                 | PLS-PC1 | PLS-PC2 | PLS-PC3 | PLS-PC4 | PLS-PC5 | PLS-PC6 | PLS-PC7 | PLS-PC8 |
|-----------------|---------|---------|---------|---------|---------|---------|---------|---------|
| <b>FT-Raman</b> | 10.60   | 6.49    | 8.64    | 2.87    | 1.45    | 1.34    | 4.04    | 1.64    |
| <b>FTIR</b>     | 9.36    | 3.92    | 4.75    | 2.28    | 3.07    | 0.94    | 8.73    | 5.26    |
