# Supplementary material for: Soil Particles and Phenanthrene Interact in Defining the Metabolic Profile of Pseudomonas putida G7: A Vibrational Spectroscopy Approach
Source: PubMed Central journal article supplement (PMC6288191; doi:10.3389/fmicb.2018.02999), 2018-12-04
Supplement: Table_2.pdf [file Table_2.pdf]

**Table S2.** Band assignment, sign and macromolecular origins of FT-Raman and FTIR PLS-DA loadings. Band assignment is based on literature references (Huang et al., 2010; Movasaghi et al., 2007a, 2008a; Naumann, 2001b) and on the reference spectra of pure macromolecules.

| <b>FT-Raman</b>                  |      |          |      |                                                                                                           |                                    |
|----------------------------------|------|----------|------|-----------------------------------------------------------------------------------------------------------|------------------------------------|
| PLS-PC1                          | Sign | PLS-PC2  | Sign | Tentative band identification                                                                             | Macromolecular assignment          |
| 2956                             | -    |          |      | CH <sub>3</sub> asymmetric stretching                                                                     | Lipids                             |
| 2921                             | -    |          |      | CH band                                                                                                   | Proteins, Lipids and nucleic acids |
|                                  | -    | 2906     |      | CH stretch                                                                                                | Carbohydrates                      |
| 2867                             |      | 2865     |      | CH <sub>2</sub> symmetric stretch of lipids and CH <sub>2</sub> asymmetric stretch of proteins and lipids | Proteins and lipids                |
| 1675                             | +    |          |      | C=O symmetric stretching Amide I ( $\beta$ -sheets)                                                       | Proteins                           |
|                                  |      | 1662     | -    | Amide I, DNA NH deformation                                                                               | Proteins and nucleic acids         |
| 1600                             | +    |          |      | Phenylalanine (C=CH deformation), tyrosine                                                                | Amino acids,                       |
|                                  |      | 1591     | -    | Phenylalanine                                                                                             | Amino acids                        |
| 1581                             | +    | 1575     | -    | G, A, ring breathing mode in nucleic acid bases                                                           | Nucleic acids                      |
| 1558                             | +    | 1560     | +    | Ring breathing mode in tryptophan, and nucleic acids                                                      | Amino acids, Nucleic acids         |
| 1452                             | +    | /        |      | CH <sub>2</sub> bending                                                                                   | Proteins and lipids                |
| 1419                             | -    | 1425     | +    | Symmetric deformation of COO-                                                                             | Proteins and lipids                |
| 1328-1395 max (1350)             | +    | 1348     | +    | CH deformation                                                                                            | Proteins and carbohydrates         |
| 1238-1328 max (1297)             | +    | 1278     | -    | Amide III                                                                                                 | Proteins                           |
| 1195-1238 max (1222)             | -    | 1216     | +    | carb (from our reference spectra)                                                                         | Carbohydrates                      |
|                                  |      | 1182     | -    | C, G, A ring breathing mode                                                                               | Nucleic acids                      |
| 1174/1162                        | +    |          |      | CH deformation in phenylalanine and tyrosine,                                                             | Amino acids                        |
| 1090-1140 max (1093, 1118, 1139) | -    | 1089     | -    | CO and CC stretching                                                                                      | Carbohydrates                      |
| 1018-1050 max (1027)             | -    |          |      | CO, CC and C-OH symmetric stretching                                                                      | Carbohydrates                      |
| 1076                             | +    | 1068     | -    | sym. PO <sub>2</sub> - stretching of DNA                                                                  | Nucleic acids                      |
| 1006                             | +    | 1016     | -    | CC symmetric ring breathing mode of phenylalanine                                                         | Amino acids                        |
| 939                              | -    |          |      | C-O-C                                                                                                     | Carbohydrates                      |
| 891                              | +    | 887      | -    | Tryptophan $\delta$ (ring)                                                                                | Amino acids                        |
| 811                              | +    | 802      | -    | O-P-O- stretch in RNA                                                                                     | Nucleic acids                      |
| 788                              | +    |          |      | CC ring stretching of cytosine and uracyl                                                                 | Nucleic acids                      |
| 707                              | +    | 707      | +    | CC ring stretching of adenine                                                                             | Nucleic acids                      |
| 626                              | +    | 636, 619 | -    | CC twisting mode of phenylalanine                                                                         | Amino acids                        |
| 586                              | -    | 582      | +    | carbohydrates                                                                                             | Carbohydrates                      |
| 555                              | +    | 551      | -    | S-S stretching                                                                                            | Proteins                           |

  

| <b>FTIR</b> |      |         |      |                                                                          |                           |
|-------------|------|---------|------|--------------------------------------------------------------------------|---------------------------|
| PLS-PC1     | Sign | PLS-PC2 | Sign | Tentative band identification                                            | Macromolecular assignment |
| 2964        | -    | 2964    | -    | asymmetric stretching of CH from CH <sub>3</sub>                         | Proteins and lipids       |
| 2917        | +    | 2917    | -    | CH asymmetric stretching of CH <sub>2</sub> in fatty acids               | lipids                    |
| 2873        | -    | 2873    | -    | CH symmetric stretching of CH <sub>3</sub>                               | Proteins                  |
| 2848        | +    | 2850    | -    | CH symmetric stretching of CH <sub>2</sub> in fatty acids                | Lipids                    |
| 1743        | +    | 1747    | -    | C=O stretching mode of esters in triglycerides and fatty acids           | Lipids                    |
| 1712        | +    | 1710    | +    | C=O stretching of nucleic acid bases                                     | Nucleic acids             |
| 1695        | -    | 1697    | -    | A high frequency vibration of an antiparallel $\beta$ -sheets of AmideI  | Proteins                  |
| 1675        | -    | 1673    | -    | $\beta$ -turns of proteins                                               | Proteins                  |
| 1656        | +    | 1654    | +    | $\alpha$ helical structure of Amide I                                    | Proteins                  |
| 1629        | -    | 1621    | -    | $\beta$ -sheet structure of Amide I                                      | Proteins                  |
|             |      | 1555    | -    | Ring base                                                                | Nucleic acids             |
| 1544        | +    | /       |      | Amide II (dN-H, nC-N)                                                    | Proteins                  |
| 1452        | /    | 1455    | -    | Asymmetric methyl deformation                                            | Proteins                  |
| 1410        | +    |         |      | $\nu$ (C=C) aromatic aminoacids                                          | Proteins                  |
| 1245        | +    | 1245    | +    | P=O asymmetric stretching of PO <sub>2</sub> <sup>-</sup> phosphodiester | Nucleic acids             |
| 1230        | -    | 1228    | -    | P=O asymmetric stretching of PO <sub>2</sub> <sup>-</sup> phosphodiester | Nucleic acids             |
| 1093        | -    | 1083    | +    | P=O symmetric stretching of PO <sub>2</sub> <sup>-</sup>                 | Nucleic acids             |
| 968         | +    | 962     | -    | backbone C-C stretching in DNA                                           | Nucleic acids             |
