# Supplementary material for: Soil Particles and Phenanthrene Interact in Defining the Metabolic Profile of Pseudomonas putida G7: A Vibrational Spectroscopy Approach
Source: PubMed Central journal article supplement (PMC6288191; doi:10.3389/fmicb.2018.02999), 2018-12-04
Supplement: Table_3.pdf [file Table_3.pdf]

**Table S3.** Diagnostic parameters of the PLS-DA models discriminating for the C-source (phenanthrene or glucose). The number of components for each model was chosen based on the minimal RMSEP and maximal  $R^2$  values. For the FT-Raman model 4 principal components were used, whereas for the FTIR model 8 principal components were used. RMSC: root mean squared error of calibration, RMSEP: root mean squared error of prediction,  $R^2_c$ : coefficient of determination for the calibration,  $R^2_p$ : coefficient of determination for predicted values, Sensitivity: ability in discriminating true positives, Specificity: ability in discriminating true negatives.

|              | FT-Raman spectroscopy | FTIR spectroscopy |
|--------------|-----------------------|-------------------|
| Sensitivity  | 0.82                  | 0.92              |
| Specificity  | 0.75                  | 0.94              |
| RMSEP        | 0.41                  | 0.28              |
| $R^2_p$      | 0.29                  | 0.67              |
| RMSEC        | 0.35                  | 0.26              |
| $R^2_c$      | 0.50                  | 0.71              |
| % variance X | 38                    | 87                |
| % variance Y | 50                    | 71                |
